# Supplementary material for: Murine endothelial serine palmitoyltransferase 1 (SPTLC1) is required for vascular development and systemic sphingolipid homeostasis
Source: eLife. 2022 Oct 5;11:e78861. doi: 10.7554/eLife.78861 (PMC9578713; doi:10.7554/eLife.78861)
Supplement: Figure 1—source data 1. [file elife-78861-fig1-data1.xlsx]

## Sheet: Figure 1F
Species (pmol/10^6 cells)	Ctrl EC 1	Ctrl EC 2	Ctrl EC 3	Ctrl EC 4	Ctrl EC 5	Sptlc1 KO EC 1	Sptlc1 KO EC 2	Sptlc1 KO EC 3	Sptlc1 KO EC 4
dhC16-Cer	0.56	0.56	0.53636	0.975	1.005	0.32	0.16333	0.30167	0.28333
dhSph	4.52	5.93	5.09091	2.99	3.0775	0.72	0.10667	0.98333	0.95667
dhS1P	2.46	3.03	1.83636	2.85	2.95	0.51	0.09	0.82	0.68
Sph	4.66	4.13	3.79091	4.19	4.0275	1.19	0.77667	1.575	1.63667
S1P	5.71	5.19	6.46364	5.45	5.45	1.38	0.96	1.46	1.3

## Sheet: Figure 1G
Species (pmol/10^6 cells)	Ctrl EC 1	Ctrl EC 2	Ctrl EC 3	Ctrl EC 4	Ctrl EC 5	Sptlc1 KO EC 1	Sptlc1 KO EC 2	Sptlc1 KO EC 3	Sptlc1 KO EC 4
Total Ceramide	27.66	33.72	25.5636	26.23	26.675	18.36	18.52	17.27	16.4667

## Sheet: Figure 1H
Species (pmol/10^6 cells)	Ctrl EC 1	Ctrl EC 2	Ctrl EC 3	Ctrl EC 4	Ctrl EC 5	Sptlc1 KO EC 1	Sptlc1 KO EC 2	Sptlc1 KO EC 3	Sptlc1 KO EC 4
Total SM	1442	1385.72	1231.04	1723.76	1746.27	805.105	878.93	729.742	719.809

## Sheet: Figure 1I
Species (pmol/10^6 cells)	Ctrl non-EC 1	Ctrl non-EC 2	Ctrl non-EC 3	Ctrl non-EC 4	Ctrl non-EC 5	Sptlc1 KO non-EC 1	Sptlc1 KO non-EC 2	Sptlc1 KO non-EC 3	Sptlc1 KO non-EC 4
dhC16-Cer	0.15	0.15	0.13889	0.193	0.188	0.16	0.07857	0.306	0.336
dhSph	0.86	0.78	0.42	1.048	1.086	0.23	0.12321	0.43333	0.44667
dhS1P	0.5	0.24	0.11	0.116	0.106	0.09	0.02768	0.088	0.076
Sph	2.5	1.42	1.81111	2.389	2.555	1.26	1.14286	1.893	1.864
S1P	1.32	0.71	0.72111	1.23	1.07	0.39	0.24732	0.47	0.435

## Sheet: Figure 1J
Species (pmol/10^6 cells)	Ctrl non-EC 1	Ctrl non-EC 2	Ctrl non-EC 3	Ctrl non-EC 4	Ctrl non-EC 5	Sptlc1 KO non-EC 1	Sptlc1 KO non-EC 2	Sptlc1 KO non-EC 3	Sptlc1 KO non-EC 4
Total Ceramide	21.26	28.08	22.6478	20.881	21.287	19.26	15.2473	16.4023	16.2569

## Sheet: Figure 1K
Species (pmol/10^6 cells)	Ctrl non-EC 1	Ctrl non-EC 2	Ctrl non-EC 3	Ctrl non-EC 4	Ctrl non-EC 5	Sptlc1 KO non-EC 1	Sptlc1 KO non-EC 2	Sptlc1 KO non-EC 3	Sptlc1 KO non-EC 4
Total SM	661.001	575.598	684.911	726.954	761.007	578.739	548.795	723.991	712.945

## Sheet: Figure 1 Supplement 3A
Species (pmol/10^6 cells)	Ctrl EC 1	Ctrl EC 2	Ctrl EC 3	Ctrl EC 4	Ctrl EC 5	Sptlc1 KO EC 1	Sptlc1 KO EC 2	Sptlc1 KO EC 3	Sptlc1 KO EC 4
C12:0	0.2	0.09	0.06364	0.0575	0.0625	0.08	0.05333	0.04167	0.04
C14:0	0.04	0.04		0.06	0.0525	0.03	0.01333	0.03667	0.03833
C16:0	7.74	8.08	5.38636	6.8625	7.0875	5.46	5.56	4.60167	4.415
C18:1	0.33	0.24	0.17727	0.17	0.18	0.18	0.3	0.11333	0.10833
C18:0	1.64	1.41	1.29545	0.56	0.5425	0.76	1.18	0.425	0.41667
C20	1.24	1.43	1.25	0.8025	0.8	0.79	1.05333	0.53667	0.50667
C22:1	0.41	0.4	0.28636	0.305	0.31	0.17	0.18667	0.16	0.155
C22:0	2.5	3.18	3.92273	2.48	2.555	1.45	2.02333	1.53	1.46167
C24:1	6.29	7.22	5.76364	6.215	6.195	3.42	3.78333	4.125	3.92
C24:0	6.24	11.08	6.87727	8.2875	8.465	5.78	4.21333	5.45333	5.16667
C26:1	0.18	0.17	0.04091	0.1125	0.1175	0.1	0.01	0.09333	0.08667
C26:0	0.85	0.38	0.5	0.3175	0.3075	0.14	0.14333	0.15333	0.15167
	27.66	33.72	25.5636	26.23	26.675	18.36	18.52	17.27	16.4667

## Sheet: Figure 1 Supplement 3B
Species (pmol/10^6 cells)	Ctrl EC 1	Ctrl EC 2	Ctrl EC 3	Ctrl EC 4	Ctrl EC 5	Sptlc1 KO EC 1	Sptlc1 KO EC 2	Sptlc1 KO EC 3	Sptlc1 KO EC 4
C14-SM	1.20988	1.0217	57.9695	2.50165	2.85506	1.11597	45.4215	3.38558	3.26935
C16-SM	401.939	231.673	324.853	416.596	453.541	318.909	251.975	368.238	362.478
C18:1-SM	1.36431	1.15658	1.54967	36.9124	36.6926	1.79031	1.51325	47.2506	44.6933
C18-SM	33.7345	19.6327	41.8851	2.83049	2.95177	17.6982	37.8642	3.86673	3.80948
C20:1-SM	1.78285	1.28191	1.89549	16.7696	17.7563	1.60269	1.81577	24.8641	24.5172
C20-SM	20.6912	30.7675	41.8851	2.49122	2.51015	27.9929	15.0869	3.12469	3.25842
C22:1-SM	6.80521	5.53661	4.22344	68.6675	71.3756	5.58809	3.93553	80.9365	83.5242
C22-SM	70.1362	129.694	74.7528	8.93439	9.3754	70.9607	62.1288	10.1936	10.3939
C24:1-SM	68.4647	54.5776	69.2018	75.5478	69.5508	62.2857	57.0682	85.8557	82.0472
C24-SM	53.8476	98.9967	91.1467	95.1093	93.7336	69.8303	71.2463	95.5677	94.1721
C26:1-SM	0.479247	0.618654	0.559419	0.313139	0.349683	0.552754	0.445501	0.353348	0.361202
C26-SM	0.546265	0.641567	0.429453	0.280534	0.315464	0.412043	0.294815	0.35359	0.420792

## Sheet: Figure 1 Supplement 3C
Species (pmol/10^6 cells)	Ctrl non-EC 1	Ctrl non-EC 2	Ctrl non-EC 3	Ctrl non-EC 4	Ctrl non-EC 5	Sptlc1 KO non-EC 1	Sptlc1 KO non-EC 2	Sptlc1 KO non-EC 3	Sptlc1 KO non-EC 4
C12-Cer	0.04	0.03	0.01444	0.025	0.025	0.02	0.01429	0.01308	0.01923
C14-Cer	0.04	0.04	0.02667	0.043	0.043	0.03	0.01696	0.02231	0.03077
C16-Cer	7.89	9.2	9.89	6.087	5.99	8.11	6.05	3.09231	3.27538
C18:1-Cer	0.16	0.1	0.20778	0.151	0.151	0.1	0.17143	0.09385	0.10308
C18-Cer	1.81	0.85	1.37556	0.472	0.475	0.49	0.92768	0.37154	0.37538
C20-Cer	0.71	0.89	1.11222	0.598	0.595	0.53	0.69911	0.47385	0.48769
C22:1-Cer	0.16	0.31	0.09667	0.187	0.197	0.11	0.07232	0.12846	0.12846
C22-Cer	1.36	3.54	1.24333	1.774	1.847	1.15	0.9	1.57	1.50308
C24:1-Cer	4.77	6.13	4.97667	5.111	5.369	3.71	3.79464	4.47769	4.20538
C24-Cer	3.39	6.82	3.51111	6.03	6.134	4.84	2.48214	5.88231	5.85923
C26:1-Cer	0.09	0.06	0.00556	0.084	0.097	0.07	0.00357	0.10231	0.09308
C26-Cer	0.84	0.13	0.18778	0.319	0.364	0.09	0.11518	0.17462	0.17615

## Sheet: Figure 1 Supplement 3D
Species (pmol/10^6 cells)	Ctrl non-EC 1	Ctrl non-EC 2	Ctrl non-EC 3	Ctrl non-EC 4	Ctrl non-EC 5	Sptlc1 KO non-EC 1	Sptlc1 KO non-EC 2	Sptlc1 KO non-EC 3	Sptlc1 KO non-EC 4
C14-SM	1.20988	1.0217	57.9695	2.50165	2.85506	1.11597	45.4215	3.38558	3.26935
C16-SM	401.939	231.673	324.853	416.596	453.541	318.909	251.975	368.238	362.478
C18:1-SM	1.36431	1.15658	1.54967	36.9124	36.6926	1.79031	1.51325	47.2506	44.6933
C18-SM	33.7345	19.6327	41.8851	2.83049	2.95177	17.6982	37.8642	3.86673	3.80948
C20:1-SM	1.78285	1.28191	1.89549	16.7696	17.7563	1.60269	1.81577	24.8641	24.5172
C20-SM	20.6912	30.7675	41.8851	2.49122	2.51015	27.9929	15.0869	3.12469	3.25842
C22:1-SM	6.80521	5.53661	4.22344	68.6675	71.3756	5.58809	3.93553	80.9365	83.5242
C22-SM	70.1362	129.694	74.7528	8.93439	9.3754	70.9607	62.1288	10.1936	10.3939
C24:1-SM	68.4647	54.5776	69.2018	75.5478	69.5508	62.2857	57.0682	85.8557	82.0472
C24-SM	53.8476	98.9967	91.1467	95.1093	93.7336	69.8303	71.2463	95.5677	94.1721
C26:1-SM	0.479247	0.618654	0.559419	0.313139	0.349683	0.552754	0.445501	0.353348	0.361202
C26-SM	0.546265	0.641567	0.429453	0.280534	0.315464	0.412043	0.294815	0.35359	0.420792
