# Supplementary material for: Murine endothelial serine palmitoyltransferase 1 (SPTLC1) is required for vascular development and systemic sphingolipid homeostasis
Source: eLife. 2022 Oct 5;11:e78861. doi: 10.7554/eLife.78861 (PMC9578713; doi:10.7554/eLife.78861)
Supplement: Figure 6—source data 1. [file elife-78861-fig6-data1.xlsx]

## Sheet: Figure 6A
Species (uM)	Ctrl 1	Ctrl 2	Ctrl 3	Ctrl 4	Ctrl 5	Sptlc1 ECKO 1	Sptlc1 ECKO 2	Sptlc1 ECKO 3
dhC16-Cer	0	0	0	0	10	0	0	30
dhSph	74.4372	89.5114	60	52	130	17.7422	14.4739	50
dhS1P	219.576	229.581	180.75	177.25	120	52.3595	39.8199	10
Sph	123.662	121.194	70.25	66.75	910	44.3555	32.6163	290
S1P	958.279	1038.92	752	794.75	660	462.298	413.673	190

## Sheet: Figure 6B
Species (uM)	Ctrl 1	Ctrl 2	Ctrl 3	Ctrl 4	Ctrl 5	Sptlc1 ECKO 1	Sptlc1 ECKO 2	Sptlc1 ECKO 3
Total Ceramide	1508.75	1678.84	3087	2476.25	2275	1452.73	1471	1040.4

## Sheet: Figure 6C
Species (uM)	Ctrl 1	Ctrl 2	Ctrl 3	Ctrl 4	Ctrl 5	Sptlc1 ECKO 1	Sptlc1 ECKO 2	Sptlc1 ECKO 3
C12-Cer	1.0005	0.9338	3.5	3.25	3.8	0.8004	0.8671	4.6
C14-Cer	1.4007	1.7342	0.5	2.5	0.6	1.4007	1.0005	0.2
C16-Cer	60.5636	62.6313	92	73.75	222.8	50.4252	42.8214	127.4
C18:1-Cer	0	0	11.25	13.25	6.8	0	0	3.4
C18-Cer	7.9373	8.1374	87.75	89.5	198.2	9.0045	8.0707	82.2
C20-Cer	82.7747	136.668	184.75	187.5	102.2	148.941	150.675	53.6
C22:1-Cer	32.8164	43.8886	29.5	22.75	12.8	42.3545	34.684	4
C22-Cer	208.771	272.936	396.25	268.75	116.8	224.779	208.904	87.4
C24:1-Cer	489.511	484.909	1181.75	867.75	783.8	429.882	439.82	277.4
C24-Cer	616.708	660.13	1083	936.75	814.6	539.603	578.623	398.6
C26:1-Cer	1.7342	1.8676	5.25	2.75	4.4	1.4674	1.2006	0.2
C26-Cer	5.5361	5.0025	11.5	7.75	8.2	4.0687	4.2021	1.4

## Sheet: Figure 6D
Species (uM)	Ctrl 1	Ctrl 2	Ctrl 3	Ctrl 4	Ctrl 5	Sptlc1 ECKO 1	Sptlc1 ECKO 2	Sptlc1 ECKO 3
C14-SM	783.177	839.614	2748.59	4104.25	3497.14	839.366	669.44	1702.06
C16-SM	70786.3	67231.1	80948.7	89388.9	50502.9	60018.7	55183	28943.8
C18:1-SM	746.65	785.727	14534.8	15150.1	4895.62	825.834	797.982	810.638
C18-SM	1998.19	2044.01	2913.35	3117.15	1257.03	2078.02	2105.07	3321.6
C20:1-SM	418.061	456.861	2463.54	3189.42	1151.03	433.024	355.68	675.29
C20-SM	1252.94	1352.92	895.555	1118.14	435.105	1117.86	1039.01	254.597
C22:1-SM	6584.61	6874.08	18977.4	28619.3	10838.2	5678.64	4239.83	9239.86
C22-SM	19271.6	21235.3	3423.49	5211.46	1927.4	16540.6	14686.4	1071.33
C24:1-SM	15029	14349.1	19820.6	24560.2	9826.73	13430.5	11923.1	9682.18
C24-SM	11170.8	11684.6	43628.3	63625.4	24998.4	10246.1	8963.08	19006.8
C26:1-SM	35.629	36.1371	121.717	133.4	55.1919	39.7313	35.083	38.3406
C26-SM	32.0644	37.1388	159.682	158.845	68.9165	35.844	34.8272	67.8041
	128109	126926	190636	238377	109454	111284	100033	74814.3

## Sheet: Figure 6E
Species (uM)	Ctrl 1	Ctrl 2	Ctrl 3	Ctrl 4	Ctrl 5	Sptlc1 ECKO 1	Sptlc1 ECKO 2	Sptlc1 ECKO 3
Total SM	128109	126926	190636	238377	109454	111284	100033	74814.3

## Sheet: Figure 6F
Species (umol/10^9 RBC)	Ctrl 1	Ctrl 2	Ctrl 3	Ctrl 4	Ctrl 5	Sptlc1 ECKO 1	Sptlc1 ECKO 2	Sptlc1 ECKO 3	Sptlc1 ECKO 4
dhC16-Cer	0.00536	0.00384	0.00416	0.0241	0.0209	0.04	0.00344	0.00272	0.04
dhSph	3.16592	3.24408	1.6844	1.76364	1.00275	2.62	0.48384	0.31688	0.79
dhS1P	0.44456	0.90376	0.56912	1.14204	0.9339	0.57	0.21464	0.22336	0.22
Sph	3.39072	3.24264	1.65448	1.84524	1.2105	2.98	0.71848	0.55184	1.9
S1P	1.58472	1.62496	1.72936	1.2636	1.03995	2.22	0.90504	0.92888	0.94

## Sheet: Figure 6G
Species (umol/10^9 RBC)	Ctrl 1	Ctrl 2	Ctrl 3	Ctrl 4	Ctrl 5	Sptlc1 ECKO 1	Sptlc1 ECKO 2	Sptlc1 ECKO 3	Sptlc1 ECKO 4
C12-Cer	1.36	1.52	1.04	0.51	0.525	2.4	0.15	0.16	2.1
C14-Cer	13.6	12	13.84	3.87	4.35	20	1.48	1.44	12
C16-Cer	284.08	226.48	218.64	48.09	53.813	715.9	25.03	22.03	587.1
C18:1-Cer				14.19	11.288	53.1			47.6
C18-Cer	129.12	117.04	92.32	172.74	155.063	1299.6	10.17	9.32	1032.5
C20:1-Cer	12.48	10.72	10.88	0	0		1.02	0.77
C20-Cer	968.88	849.6	713.44	192.36	147.6	1506.9	73.58	80.71	1061.6
C22:1-Cer	39.04	32.16	45.6	33.33	33.375	41.3	4.73	3.61	34.5
C22-Cer	605.84	646.08	591.28	611.13	567.487	512.3	56.3	58.63	399
C24:1-Cer	1184.08	1098.64	976.32	943.65	828.6	2190.3	118.02	148.26	1539.4
C24-Cer	3275.84	3397.12	2935.36	4192.74	3362.59	3660.3	288.6	354.88	2461.1
C26:1-Cer	60.4	67.12	63.28	54.54	45.338	111.4	6.09	7.11	65.1
C26-Cer	477.52	527.68	545.04	395.43	358.275	406.6	49.89	51.01	395.3

## Sheet: Figure 6H
Species (umol/10^9 RBC)	Ctrl 1	Ctrl 2	Ctrl 3	Ctrl 4	Ctrl 5	Sptlc1 ECKO 1	Sptlc1 ECKO 2	Sptlc1 ECKO 3	Sptlc1 ECKO 4
Total Ceramide	7.05225	6.98616	6.20704	8	6.68	7.89	5.08048	5.90344	5.73

## Sheet: Figure 6I
Species (umol/10^9 RBC)	Ctrl 1	Ctrl 2	Ctrl 3	Ctrl 4	Ctrl 5	Sptlc1 ECKO 1	Sptlc1 ECKO 2	Sptlc1 ECKO 3
C14-SM	4.14042	4.12521	5.20339	4.11145	6.98027	4.0285	3.67586	5.23411
C16-SM	410.697	398.082	102.519	72.8227	89.0348	353.221	366.949	73.0272
C18:1-SM	1.78447	1.91183	23.7115	17.6933	17.3577	1.79077	1.87661	15.8105
C18-SM	20.7066	20.8632	1.88865	1.27512	1.45818	18.282	18.8672	1.42989
C20:1-SM	1.16377	1.20058	11.6261	7.79092	8.30476	1.03921	1.07751	7.01622
C20-SM	13.6224	14.4353	1.07096	0.7182	0.719666	11.4092	12.6274	0.608587
C22:1-SM	14.7694	14.4128	113.026	76.4186	96.735	13.3177	11.9838	84.6298
C22-SM	145.345	152.646	8.95267	6.55787	7.80724	121.834	127.07	6.81012
C24:1-SM	111.12	110.741	189.864	147.281	136.644	93.2093	95.8292	112.512
C24-SM	251.27	261.958	75.999	51.9384	64.4226	222.578	212.512	58.7419
C26:1-SM	1.60936	1.58339	3.79389	3.11999	1.86462	1.54106	1.40633	1.82004
C26-SM	3.93099	3.82294	1.18154	1.03799	0.850722	3.65753	3.29729	0.683133

## Sheet: Figure 6J
Species (umol/10^9 RBC)	Ctrl 1	Ctrl 2	Ctrl 3	Ctrl 4	Ctrl 5	Sptlc1 ECKO 1	Sptlc1 ECKO 2	Sptlc1 ECKO 3
Total SM	980.16	985.782	538.837	390.765	432.18	845.909	857.172	368.324
