# Supplementary material for: Murine endothelial serine palmitoyltransferase 1 (SPTLC1) is required for vascular development and systemic sphingolipid homeostasis
Source: eLife. 2022 Oct 5;11:e78861. doi: 10.7554/eLife.78861 (PMC9578713; doi:10.7554/eLife.78861)
Supplement: Figure 7—source data 1. [file elife-78861-fig7-data1.xlsx]

## Sheet: Figure 7A
Weeks Post Deletion S1P (uM)	Ctrl 1	Ctrl 2	Ctrl 3	Ctrl 4	Ctrl 5	Ctrl 6	Ctrl 7	Ctrl 8	Ctrl 9	Ctrl 10	Sptlc1 ECKO 1	Sptlc1 ECKO 2	Sptlc1 ECKO 3	Sptlc1 ECKO 4	Sptlc1 ECKO 5	Sptlc1 ECKO 6	Sptlc1 ECKO 7	Sptlc1 ECKO 8
0	1.46701	0.865555	1.11716	0.975349	0.833676	0.998561	1.00896	1.2083	0.842511	1.12235	1.11319	0.950923	1.09254	0.895321	0.836827	1.0426	1.2433	0.662114
1	0.917463	0.79948	0.798882	0.746165	0.628087	0.741224	0.792115				0.501821	0.470977	0.615597	0.447959	0.335059
2	0.982011	1.16659	0.885995	0.525131	0.976507	0.782588	0.846909	0.859916			0.512972	0.192343	0.258305	0.474924	0.384406	0.561549	0.304297	0.303997
3	0.820168	0.791269	0.584141	0.572529	0.545821	0.6795	0.561381	0.626327	0.883697		0.183748	0.14894	0.16012	0.21746	0.387282	0.283934
4	1.03341	0.795133	0.566047								0.188664	0.167862	0.258305	0.192343
5	0.780707	0.778999	0.649								0.13787	0.172397	0.28344
8+	1.08575	1.04022	0.730438	0.80215	1.12765	1.197	1.3394	1.13744			0.424992	0.389296	0.304584	0.272166	0.499233	0.453271

## Sheet: Figure 7B
Weeks Post Deletion S1P (umol/10^9 RBC)	Ctrl 1	Ctrl 2	Ctrl 3	Sptlc1 ECKO 1	Sptlc1 ECKO 2	Sptlc1 ECKO 3
0	268.496	213.41	229.488	279.368	285.672	224.507
1	270.194	207.938	317.084	147.155	164.696	108.296
2	314.402	331.224		172.339	145.794	181.727
3	245.356	440.551	360.66	113.635	105.516
4	230.807	377.43	382.14	77.2424	76.359
5	351.384	271.066	288.316	89.0332	114.382	194.431

## Sheet: Figure 7C
Fraction S1P (uM)	Ctrl 1	Ctrl 2	Ctrl 3	Sptlc1 ECKO 1	Sptlc1 ECKO 2	Sptlc1 ECKO 3
HDL	0.270142	0.48	0.296	0.228576	0.36	0.224
LPF	0.321725	0.61	0.427	0.0978691	0.22	0.126
Total	0.59187	1.09	0.723	0.32645	0.58	0.35

## Sheet: Figure 7D
S1P (uM)	Ctrl 1	Ctrl 2	Ctrl 3	Ctrl 4	Ctrl 5	Ctrl 6	Ctrl 7	Sptlc1 ECKO 1	Sptlc1 ECKO 2	Sptlc1 ECKO 3	Sptlc1 ECKO 4
P14	0.449	0.443	0.479	0	0	0	0	0.13	0.273	0.206	0.261
P21	0.758	0.657	0.947	0.802	0.79	0	0	0.236	0.284	0.4	0.417
P28	0.918	0.806	0.84	1.05	0.919	0.681	0.834	0.379	0.616	0.416	0.385

## Sheet: Figure 7E
dhS1P (uM)	Ctrl 1	Ctrl 2	Ctrl 3	Ctrl 4	Ctrl 5	Ctrl 6	Ctrl 7	Sptlc1 ECKO 1	Sptlc1 ECKO 2	Sptlc1 ECKO 3	Sptlc1 ECKO 4
P14	0.199	0.193	0.189	0	0	0	0	0.0196	0.0642	0.0393	0.051
P21	0.425	0.295	0.509	0.421	0.342	0	0	0.0449	0.0515	0.0751	0.11
P28	0.513	0.416	0.494	0.594	0.569	0.402	0.541	0.106	0.244	0.067	0.0593

## Sheet: Figure 7F
Sph (uM)	Ctrl 1	Ctrl 2	Ctrl 3	Ctrl 4	Ctrl 5	Ctrl 6	Ctrl 7	Sptlc1 ECKO 1	Sptlc1 ECKO 2	Sptlc1 ECKO 3	Sptlc1 ECKO 4
P14	13.4	20.9	8.38					1.77	4.73	2.5	6.25
P21	56.7	81.1	61.9	46.8	73.5			2.66	12.3	18.9	22
P28	113	70.8	83.5	86.7	76.3	24.6	38.2	17.4	56.1	10.7	19.3

## Sheet: Figure 7G
dhSph (uM)	Ctrl 1	Ctrl 2	Ctrl 3	Ctrl 4	Ctrl 5	Ctrl 6	Ctrl 7	Sptlc1 ECKO 1	Sptlc1 ECKO 2	Sptlc1 ECKO 3	Sptlc1 ECKO 4
P14	12.9	29.5	9.6					1.01	4.99	2.62	3.3
P21	52.1	61.7	42	33.7	55.5			2.08	6.26	9.78	11.3
P28	101	59	84.2	84	66.8	24.1	45.3	13.9	39.2	5.67	8.01

## Sheet: Figure 7H
dhC16-Cer (uM)	Ctrl 1	Ctrl 2	Ctrl 3	Ctrl 4	Ctrl 5	Ctrl 6	Ctrl 7	Sptlc1 ECKO 1	Sptlc1 ECKO 2	Sptlc1 ECKO 3	Sptlc1 ECKO 4
P14	169	129	62.4					128	228	73.9	21.8
P21	133	76.4	64.7	98	64.4			102	75.1	45.8	102
P28	51.1	17.1	28.2	36.3	32.5	21.6	30.4	58.4	49	24.8	16.4

## Sheet: Figure 7I
Total Cer (uM)	Ctrl 1	Ctrl 2	Ctrl 3	Ctrl 4	Ctrl 5	Ctrl 6	Ctrl 7	Sptlc1 ECKO 1	Sptlc1 ECKO 2	Sptlc1 ECKO 3	Sptlc1 ECKO 4
P14	5.48268	3.79177	2.88684	0	0	0	0	4.33181	4.49034	2.93001	1.57046
P21	1.82032	1.66502	1.43553	1.65687	1.66986	0	0	1.62967	1.70608	1.46056	1.9026
P28	1.96581	1.68914	1.65586	2.30025	1.52225	1.48579	2.01844	1.51185	1.48495	1.4516	1.59802

## Sheet: Figure 7J
Total SM (uM)	Ctrl 1	Ctrl 2	Ctrl 3	Ctrl 4	Ctrl 5	Ctrl 6	Ctrl 7	Sptlc1 ECKO 1	Sptlc1 ECKO 2	Sptlc1 ECKO 3	Sptlc1 ECKO 4
P14	84.1132	85.0871	79.467	0	0	0	0	88.233	79.0228	78.0467	103.958
P21	63.418	58.83	63.92	64.677	58.658	0	0	61.772	64.167	60.496	71.16
P28	76.4133	75.6858	71.0832	92.705	67.3531	61.6024	65.4253	66.7504	61.6343	65.9957	80.7749

[truncated: 6 more sheets: Figure 7 Supplement 2A, Figure 7 Supplement 2B, Figure 7 Supplement 2C, Figure 7 Supplement 2D, Figure 7 Supplement 2E, Figure 7 Supplement 2F]
