# Supplementary material for: Murine endothelial serine palmitoyltransferase 1 (SPTLC1) is required for vascular development and systemic sphingolipid homeostasis
Source: eLife. 2022 Oct 5;11:e78861. doi: 10.7554/eLife.78861 (PMC9578713; doi:10.7554/eLife.78861)
Supplement: Figure 8—source data 1. [file elife-78861-fig8-data1.xlsx]

## Sheet: Figure 8A
Species (pmol/mg protein)	Ctrl 1	Ctrl 2	Ctrl 3	Ctrl 4	Ctrl 5	Sptlc1 ECKO 1	Sptlc1 ECKO 2	Sptlc1 ECKO 3
dhC16-Cer	1.49	1.99	0.48	0.28	0.045	0.85	0.37	0.03
dhSph	2.81	4.015	9.44	11.12	5.74	0.605	0.515	1.7
dhS1P	0.1	0.105	0.1	0	0.115	0.095	0.095	0.1
Sph	7.455	9.385	23.27	14.54	24.765	8.85	6.955	14.755
S1P	0.245	0.27	0.16	0.12	0.11	0.19	0.29	0.13

## Sheet: Figure 8B
Species (pmol/mg protein)	Ctrl 1	Ctrl 2	Ctrl 3	Ctrl 4	Ctrl 5	Sptlc1 ECKO 1	Sptlc1 ECKO 2	Sptlc1 ECKO 3
C12-Cer	0.105	0.105	0.24	0.23	0.48	0.105	0.105	0.105
C14-Cer	0.645	0.615	5.88	5.78	2.08	0.705	0.565	1.58
C16-Cer	2.82	3.095	17.01	18.88	16.735	2.255	2.475	23.54
C18:1-Cer	2.91	3.41	13.31	11.29	0.975	3.465	2.835	0.985
C18-Cer	8.595	12.875	69	62.49	62.585	10.09	7.555	56.015
C20:1-Cer	1.57	1.465				1.635	0.625
C20-Cer	62.37	89.355	366.26	255.9	99.145	75.65	47.55	79.355
C22:1-Cer	33.905	23.04	25.65	26.34	6.15	22.925	19.205	4.33
C22-Cer	219.385	203.35	147.93	141.85	19.06	134.485	127.76	16.215
C24:1-Cer	231.335	187.505	380.84	432.41	243.68	125.315	114.63	142.975
C24-Cer	213.555	170.77	185.55	236.58	86.785	133.87	134.675	41.755
C26:1-Cer	0.485	0.325	1.49	1.53	0.88	0.33	0.285	0.375
C26-Cer	0.845	0.46	2.58	2.14	1.515	0.43	0.38	0.715

## Sheet: Figure 8C
Species (pmol/mg protein)	Ctrl 1	Ctrl 2	Ctrl 3	Ctrl 4	Ctrl 5	Sptlc1 ECKO 1	Sptlc1 ECKO 2	Sptlc1 ECKO 3
Total Ceramide	1557.05	1312.74	1215.73	1195.39	1079.42	1022.52	917.29	735.89

## Sheet: Figure 8D
Species (pmol/mg protein)	Ctrl 1	Ctrl 2	Ctrl 3	Ctrl 4	Ctrl 5	Sptlc1 ECKO 1	Sptlc1 ECKO 2	Sptlc1 ECKO 3
dhC16-Cer	0.515	0.78	3.33	3.97	2.46	0.405	0.44	1.66
dhSph	21.215	38.945	44.76	38.85	32.09	10.535	12.31	21.31
dhS1P	3.97	2.8	1.06	0.93	0.53	0.825	1.2	0.33
Sph	49.395	86.83	153.55	132.63	140.04	25.76	33.815	116.3
S1P	4.005	2.79	2.23	1.88	1.1	1.685	2.22	0.8

## Sheet: Figure 8E
Species (pmol/mg protein)	Ctrl 1	Ctrl 2	Ctrl 3	Ctrl 4	Ctrl 5	Sptlc1 ECKO 1	Sptlc1 ECKO 2	Sptlc1 ECKO 3
C12-Cer	0.13	0.1	0.26	0.22	0.24	0.115	0.11	0.26
C14-Cer	1.2	1.165	2.78	3.1	6.34	0.895	0.725	9.06
C16-Cer	23.03	27.29	28.96	31.2	435.68	22.775	21.39	370.16
C18:1-Cer	15.98	25.525	102.76	103.64	25.76	12.96	13.545	21.76
C18-Cer	66.105	87.39	252.16	262.7	330.58	54.46	53.7	245.54
C20:1-Cer
C20-Cer	77.71	86.8	430.04	450.24	443.22	57.6	58.02	364.48
C22:1-Cer	18.285	30.645	16.96	20.4	6.6	11.705	12.27	11.02
C22-Cer	178.17	259.115	205.82	225.48	65.1	102.845	129.15	94.96
C24:1-Cer	547.705	889.805	475.78	557.72	1145.66	287.06	329.24	550.24
C24-Cer	726.715	935.635	995.54	1058.18	1220.14	483.77	556.915	674.68
C26:1-Cer	7.305	12.23	12.52	12.38	25.44	5.895	6.48	17.4
C26-Cer	20.305	18.08	14.6	20.34	126.94	10.985	13.265	29.04

## Sheet: Figure 8F
Species (pmol/mg protein)	Ctrl 1	Ctrl 2	Ctrl 3	Ctrl 4	Ctrl 5	Sptlc1 ECKO 1	Sptlc1 ECKO 2	Sptlc1 ECKO 3
Total Ceramide	2682.64	2373.78	2538.18	2745.6	3831.7	1051.07	1194.81	2188.6

## Sheet: Figure 8G
Species (pmol/Retina)	Ctrl 1	Ctrl 2	Ctrl 3	Ctrl 4	Ctrl 5	Sptlc1 ECKO 1	Sptlc1 ECKO 2	Sptlc1 ECKO 3	Sptlc1 ECKO 4
dhC16-Cer	8.61	5.61	3.91	3.14	3.1	4.3	4.59	3.77	4.6
dh Sph	15.3	1.88	2.36	3.73	0.967	3.92	0.788	3.59	2.49
dh S1P	3.45	3.29	3.56	3.58	4.28	3.69	3.74	3.66	3.25
Sph	25.4	11.7	10.4	11.2	11.2	10.4	11.8	10	11.4
S1P	4.05	4	4.14	4.45	4.44	4.12	4.3	4.07	4.29

## Sheet: Figure 8H
Species (pmol/Retina)	Ctrl 1	Ctrl 2	Ctrl 3	Ctrl 4	Ctrl 5	Sptlc1 ECKO 1	Sptlc1 ECKO 2	Sptlc1 ECKO 3	Sptlc1 ECKO 4
C12-Cer	0.0794	0.0319		0.0196	0.00867			0.052	0.102
C14-Cer	2.7	2.33	1.51	1.41	1.31	2.04	1.89	1.76	2.35
C16-Cer	591	391	253	190	211	323	407	258	316
C18:1-Cer	1.53	1.05	0.905	0.456	0.563	1.04	1.02	0.905	1.27
C18-Cer	482	407	298	270	257	344	355	298	393
C20-Cer	56.4	42.7	34.5	36.9	34.6	43.4	39.6	35.7	48.2
C22-Cer	33.1	26.6	19.3	19.5	20.2	25.8	23.4	21.5	28.5
C24:1-Cer	39.3	30.9	18.1	14.3	15.4	25.9	27.2	22	28.8
C24-Cer	14.5	11.9	6.77	7.34	6.82	11	10.1	8.07	16
C17-Cer	18	13.3	7.55	6.62	7.16	9.53	10.1	9.15	9.64

## Sheet: Figure 8I
Species (pmol/Retina)	Ctrl 1	Ctrl 2	Ctrl 3	Ctrl 4	Ctrl 5	Sptlc1 ECKO 1	Sptlc1 ECKO 2	Sptlc1 ECKO 3	Sptlc1 ECKO 4
Total Ceramide	1238.61	926.812	639.635	546.546	554.062	785.71	875.31	655.137	843.862
