# Supplementary material for: Murine endothelial serine palmitoyltransferase 1 (SPTLC1) is required for vascular development and systemic sphingolipid homeostasis
Source: eLife. 2022 Oct 5;11:e78861. doi: 10.7554/eLife.78861 (PMC9578713; doi:10.7554/eLife.78861)
Supplement: Figure 9—source data 1. [file elife-78861-fig9-data1.xlsx]

## Sheet: Figure 9D
Species (pmol/mg protein)	Ctrl 1	Ctrl 2	Ctrl 3	Ctrl 4	Sptlc1 ECKO 1	Sptlc1 ECKO 2	Sptlc1 ECKO 3	Sptlc1 ECKO 4
dhC16-Cer	0.492	0.42	0.66	0.418	0.228	0.234	0.123	0.126
dhSph	11.084	7.128	10.914	6.878	4.234	1.622	1.429	1.646
dhS1P	0.056	0.052	0.066	0.05	0.046	0.036	0.027	0.027
Sph	8.18	14.396	7.144	5.488	4.196	3.876	4.196	4.821
S1P	0.088	0.1	0.088	0.074	0.076	0.064	0.056	0.056

## Sheet: Figure 9E
Species (pmol/mg protein)	Ctrl 1	Ctrl 2	Ctrl 3	Ctrl 4	Sptlc1 ECKO 1	Sptlc1 ECKO 2	Sptlc1 ECKO 3	Sptlc1 ECKO 4
C12-Cer	0.06	0.076	0.056	0.056	0.052	0.048	0.043	0.041
C14-Cer	1.402	1.22	1.192	0.782	0.664	0.622	0.709	0.731
C16-Cer	6.474	12.73	8.986	5.76	5.378	5.022	3.171	3.177
C18:1-Cer	3.45	2.126	2.068	1.518	1.228	1.478	1.869	1.963
C18-Cer	28.394	20.63	16.882	13.794	8.536	11.266	11.279	11.824
C20:1-Cer
C20-Cer	27.642	14.312	11.724	9.418	6.166	10.308	13.139	14.876
C22:1-Cer	3.374	3.634	3.228	2.644	2.164	2.512	2.469	2.514
C22-Cer	40.786	23.844	18.054	17.546	14.514	15.368	14.86	15.073
C24:1-Cer	86.3	94.734	71.972	60.236	52.304	52.354	50.317	53.324
C24-Cer	90.75	37.412	43.232	35.472	30.748	24.542	29.607	27.29
C26:1-Cer	0.646	0.14	0.242	0.146	0.15	0.104	0.137	0.133
C26-Cer	1.006	0.23	0.328	0.292	0.304	0.218	0.196	0.216

## Sheet: Figure 9F
Species (pmol/mg protein)	Ctrl 1	Ctrl 2	Ctrl 3	Ctrl 4	Sptlc1 ECKO 1	Sptlc1 ECKO 2	Sptlc1 ECKO 3	Sptlc1 ECKO 4
Total Ceramide	290.284	211.088	177.964	147.664	122.208	123.842	127.794	131.163

## Sheet: Figure 9G
Species (pmol/mg protein)	Ctrl 1	Ctrl 2	Ctrl 3	Ctrl 4	Sptlc1 ECKO 1	Sptlc1 ECKO 2	Sptlc1 ECKO 3	Sptlc1 ECKO 4	Sptlc1 ECKO 5
dhC16-Cer	4.33	4.66	5.08	5.73	0.56	3.58	1.89	4.15	3.93
dhSph	5.55	4.03	12.22	8.62	1.11	2.19	0.74	1.76	1.23
dhS1P	0.13	0.14	0.35	0.32	0.12	0.13	0.1	0.11	0.11
Sph	12.81	10.95	5.38	4.46	4.23	9.97	8.21	12.38	8.24
S1P	0.32	0.36	0.27	0.28	0.25	0.39	0.34	0.29	0.26

## Sheet: Figure 9H
Species (pmol/mg protein)	Ctrl 1	Ctrl 2	Ctrl 3	Ctrl 4	Sptlc1 ECKO 1	Sptlc1 ECKO 2	Sptlc1 ECKO 3	Sptlc1 ECKO 4	Sptlc1 ECKO 5
C12-Cer	0.06	0.07	0.06	0.07	0.01	0.08	0.08	0.06	0.07
C14-Cer	1	0.72	0.38	0.39	0.22	0.8	0.92	0.95	0.66
C16-Cer	55.12	47.74	33.41	35.92	26.09	36.8	47.14	50.8	48.32
C18:1-Cer	5.07	1.45	0.89	0.8	1.14	2.29	4.81	3.98	1.99
C18-Cer	15.6	2.97	2.23	1.53	2.81	4.53	16.68	14.16	3.35
C20:1-Cer	0.42	0.27	0.17	0.08	0.18	0.36	0.42	0.45	0.28
C20-Cer	5.67	4.41	3.92	3.48	3.68	7.6	7.08	3.86	5.36
C22:1-Cer	6.05	7.33	3.11	4.06	4.46	6.26	6.83	1.93	9.96
C22-Cer	86.13	133.2	52.12	91.75	80.54	131.59	89.59	36.89	136.68
C24:1-Cer	194.36	126.05	47.55	65.36	62.92	107.21	206.18	85.8	121.05
C24-Cer	112.6	140.5	46.9	69.24	61.92	136.78	115.05	59.5	104.95
C26:1-Cer	1.22	0.52	0.24	0.21	0.22	0.52	1.24	0.45	0.56
C26-Cer	1.69	0.84	0.47	0.35	0.3	1.02	1.33	0.58	0.74

## Sheet: Figure 9I
Species (pmol/mg protein)	Ctrl 1	Ctrl 2	Ctrl 3	Ctrl 4	Sptlc1 ECKO 1	Sptlc1 ECKO 2	Sptlc1 ECKO 3	Sptlc1 ECKO 4	Sptlc1 ECKO 5
Total Ceramide	484.99	466.08	191.43	273.24	244.48	435.84	497.36	259.41	433.98
