# Supplementary material for: Murine endothelial serine palmitoyltransferase 1 (SPTLC1) is required for vascular development and systemic sphingolipid homeostasis
Source: eLife journal article supplement (doi:10.7554/elife.78861), 2022-10-05
Supplement: supp [file elife-78861-supp-v1.zip]

Figure 1-Figure Supplement 1

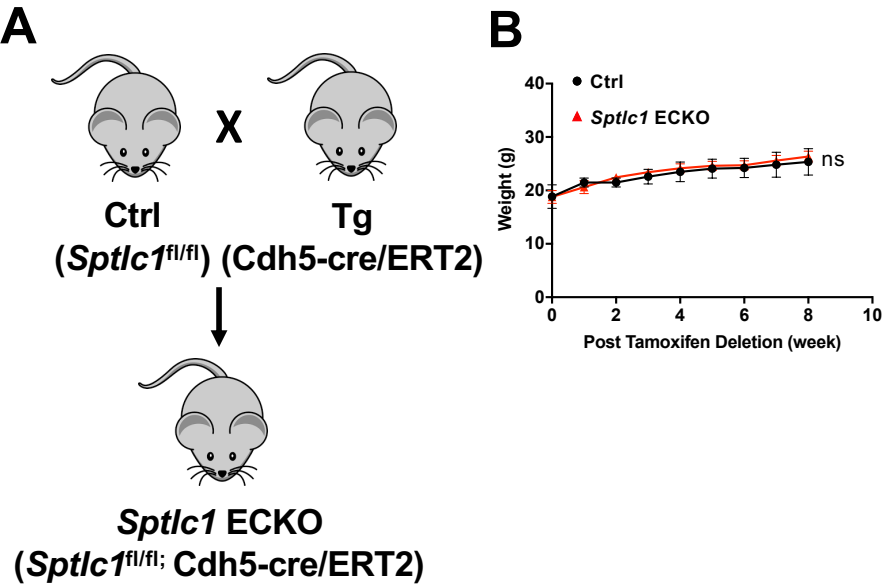

**C**

|                          | Ctrl          | SPTLC1 ECKO  |
|--------------------------|---------------|--------------|
| ALB (g/dL)               | 4.4±0.14      | 4.17±0.23    |
| ALP (U/L)                | 95.25±28.08   | 110.67±17.24 |
| ALT (U/L)                | 38.75±7.80    | 32.33±5.13   |
| AMY (U/L)                | 671.75±143.93 | 571.67±54.7  |
| TBIL (mg/dL)             | 0.2±          | 0.13±0.06    |
| BUN (mg/dL)              | 25.5±3.87     | 21.67±2.52   |
| Ca (mg/dL)               | 12.9±0.14     | 12.533±0.15  |
| Phos (mg/dL)             | 13.275±0.37   | 11.83±0.71   |
| Crea (mg/dL)             | 0.35±0.21     | 0.27±0.06    |
| Glu (mg/dL)              | 403±75.92     | 362±90.16    |
| Na <sup>+</sup> (mmol/L) | 163.25±3.59   | 161.67±1.53  |
| K <sup>+</sup>           | N/A           | N/A          |
| TP (g/dL)                | 5.75±0.1      | 5.3±0.35     |
| Glob (g/dL)              | 1.35±0.21     | 1.13±0.12    |
