# Supplementary figures and images for: Murine endothelial serine palmitoyltransferase 1 (SPTLC1) is required for vascular development and systemic sphingolipid homeostasis
Source: eLife journal article supplement (doi:10.7554/elife.78861), 2022-10-05

Figure 1-Figure Supplement 3

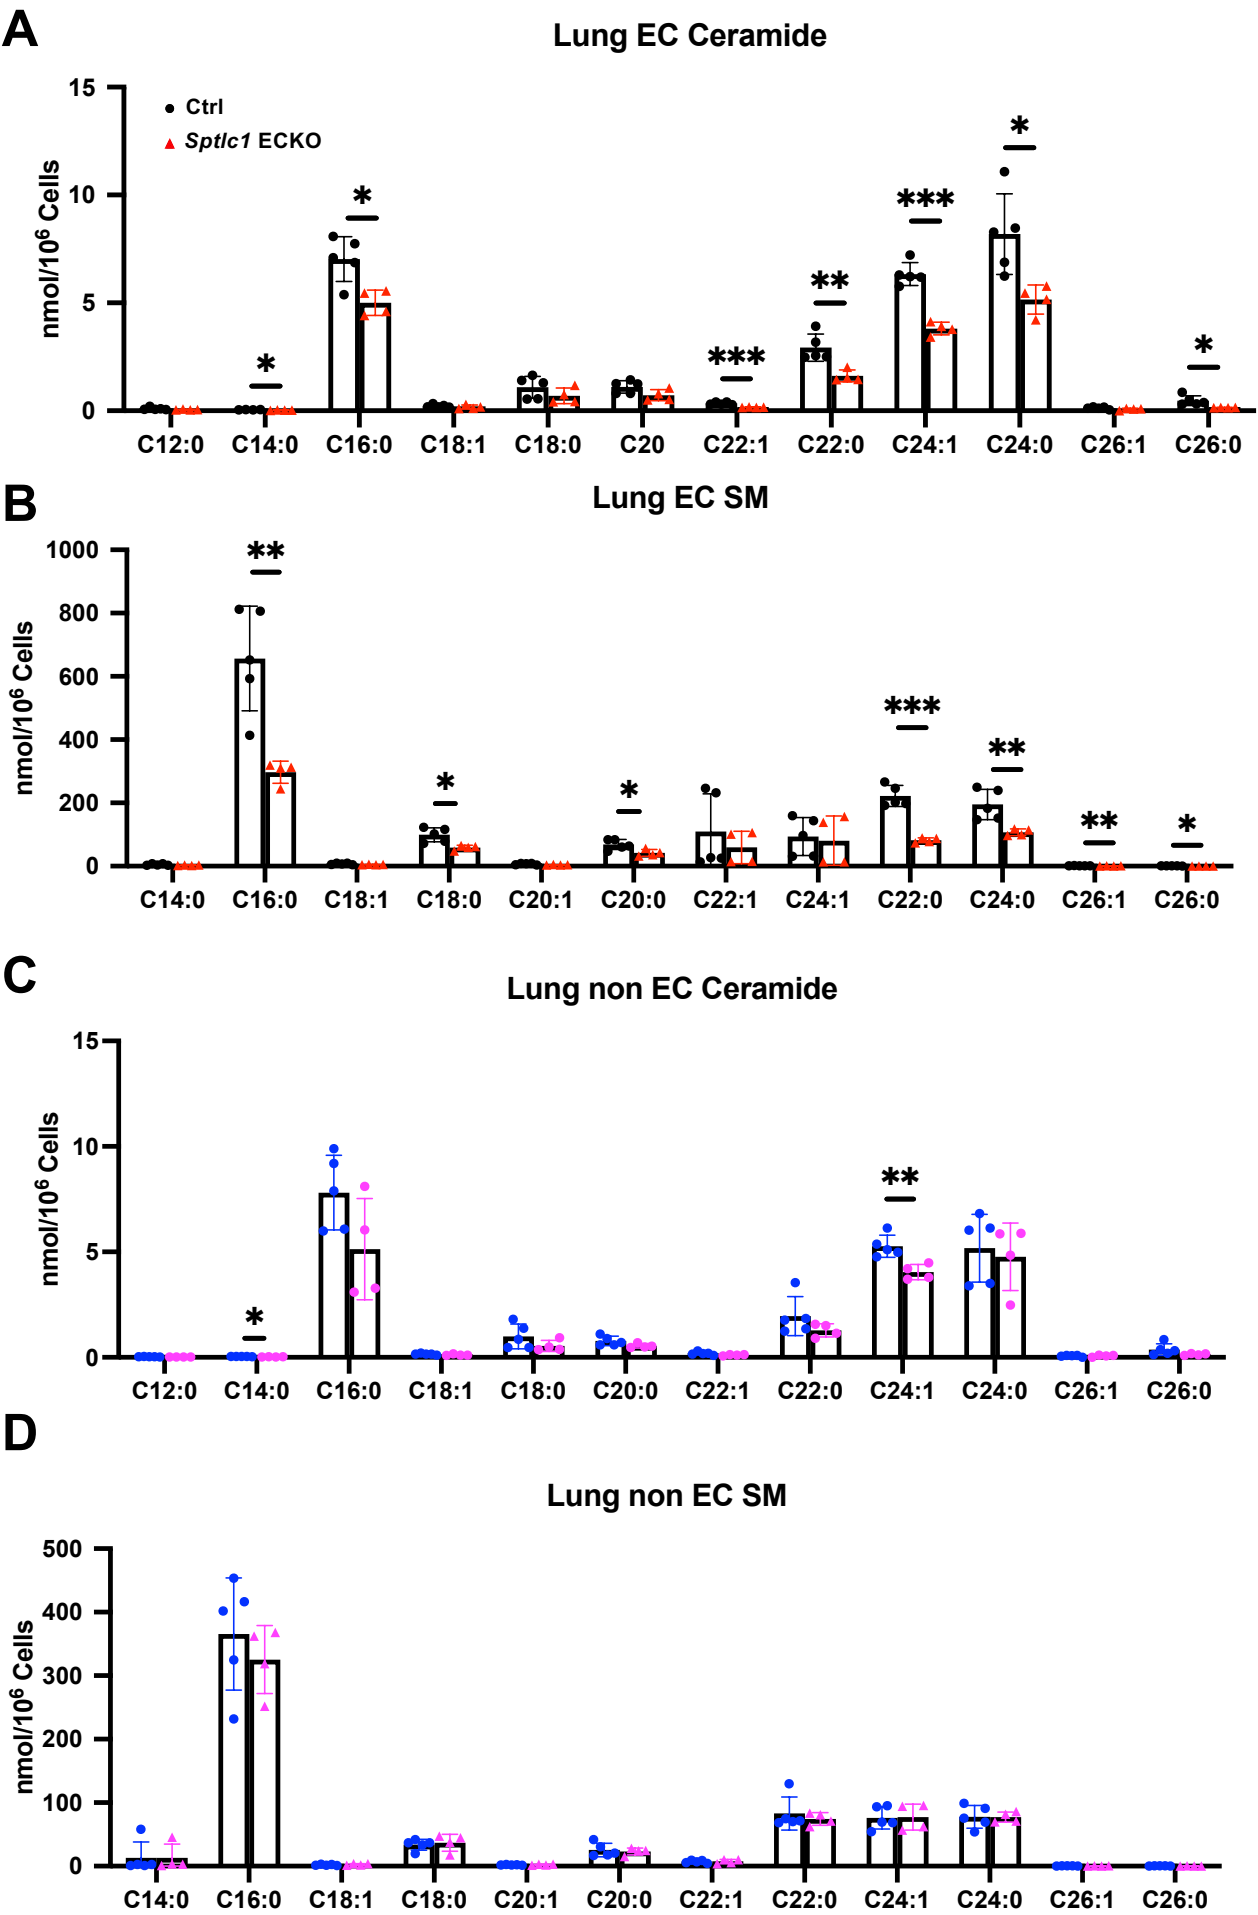

Supplement: supp [file elife-78861-supp-v1.zip]

Figure 3-Figure Supplement 2

A

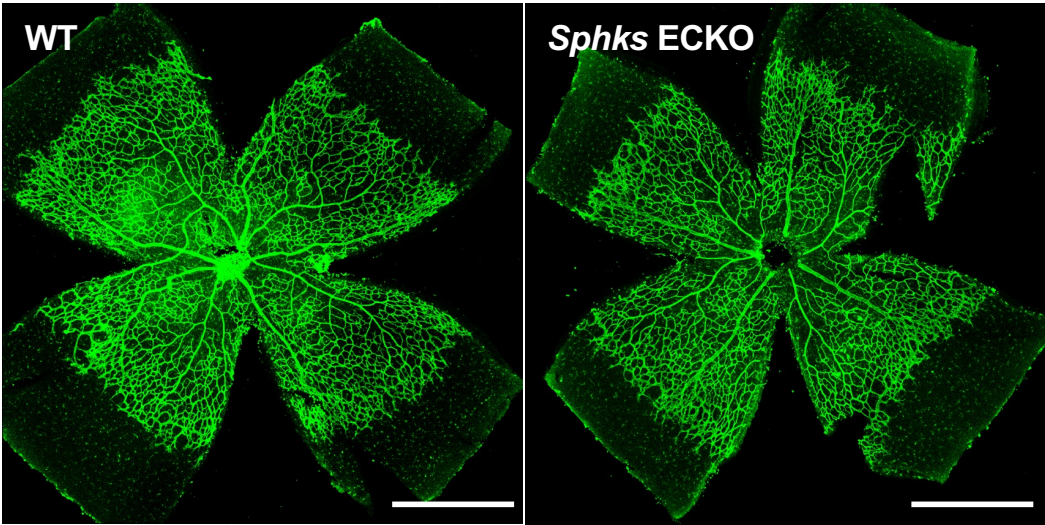

B

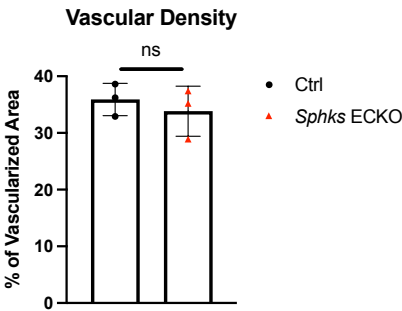

C

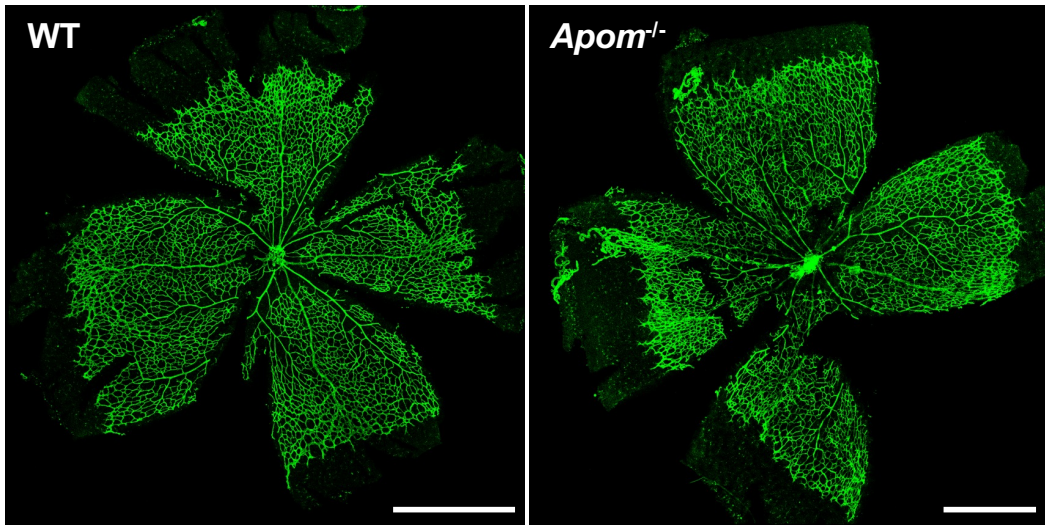

D

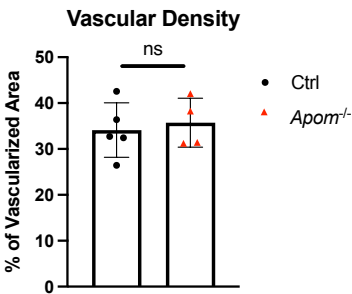

Supplement: supp [file elife-78861-supp-v1.zip]

Figure 1-Figure Supplement 2

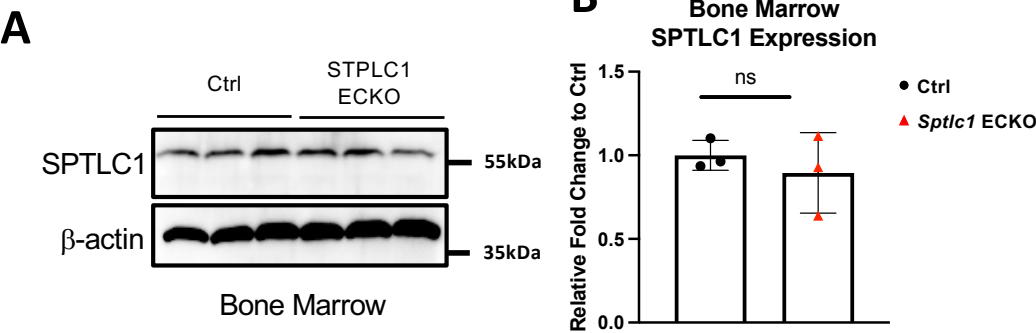

Supplement: supp [file elife-78861-supp-v1.zip]

Figure 7-Figure Supplement 1

A

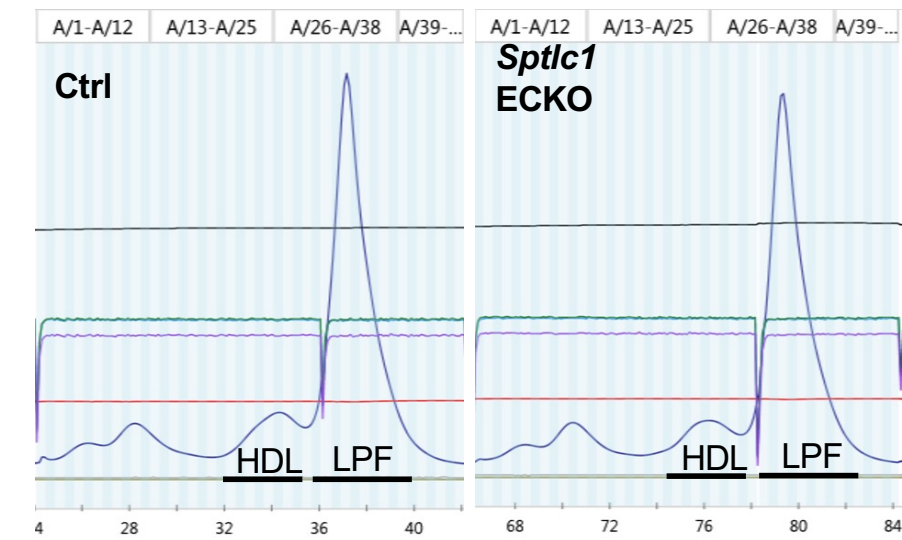

B

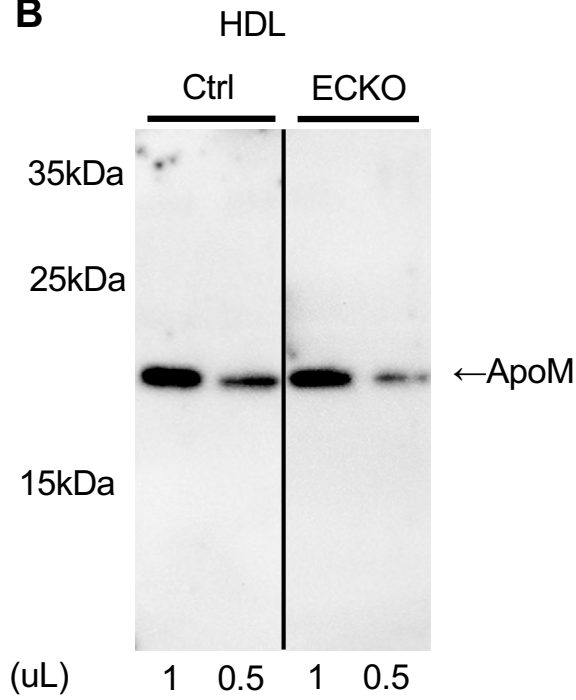

C

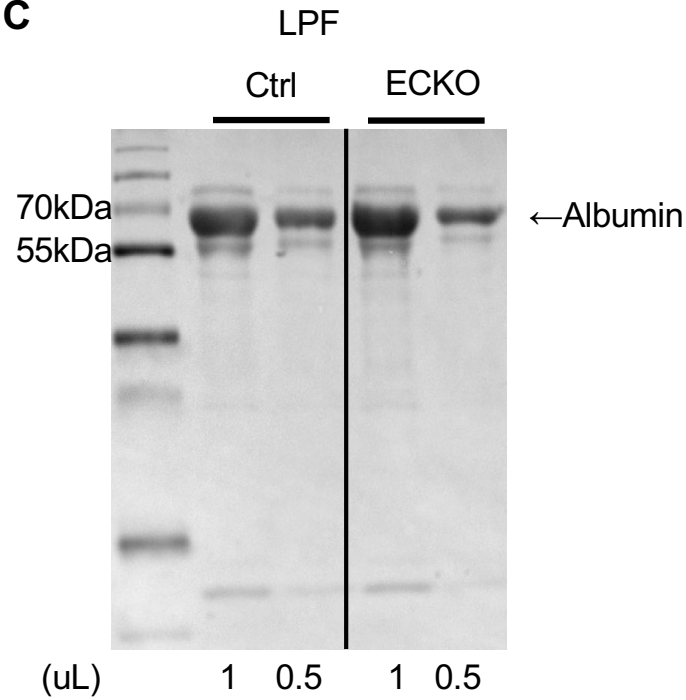

Supplement: supp [file elife-78861-supp-v1.zip]

Figure 7-Figure Supplement 2

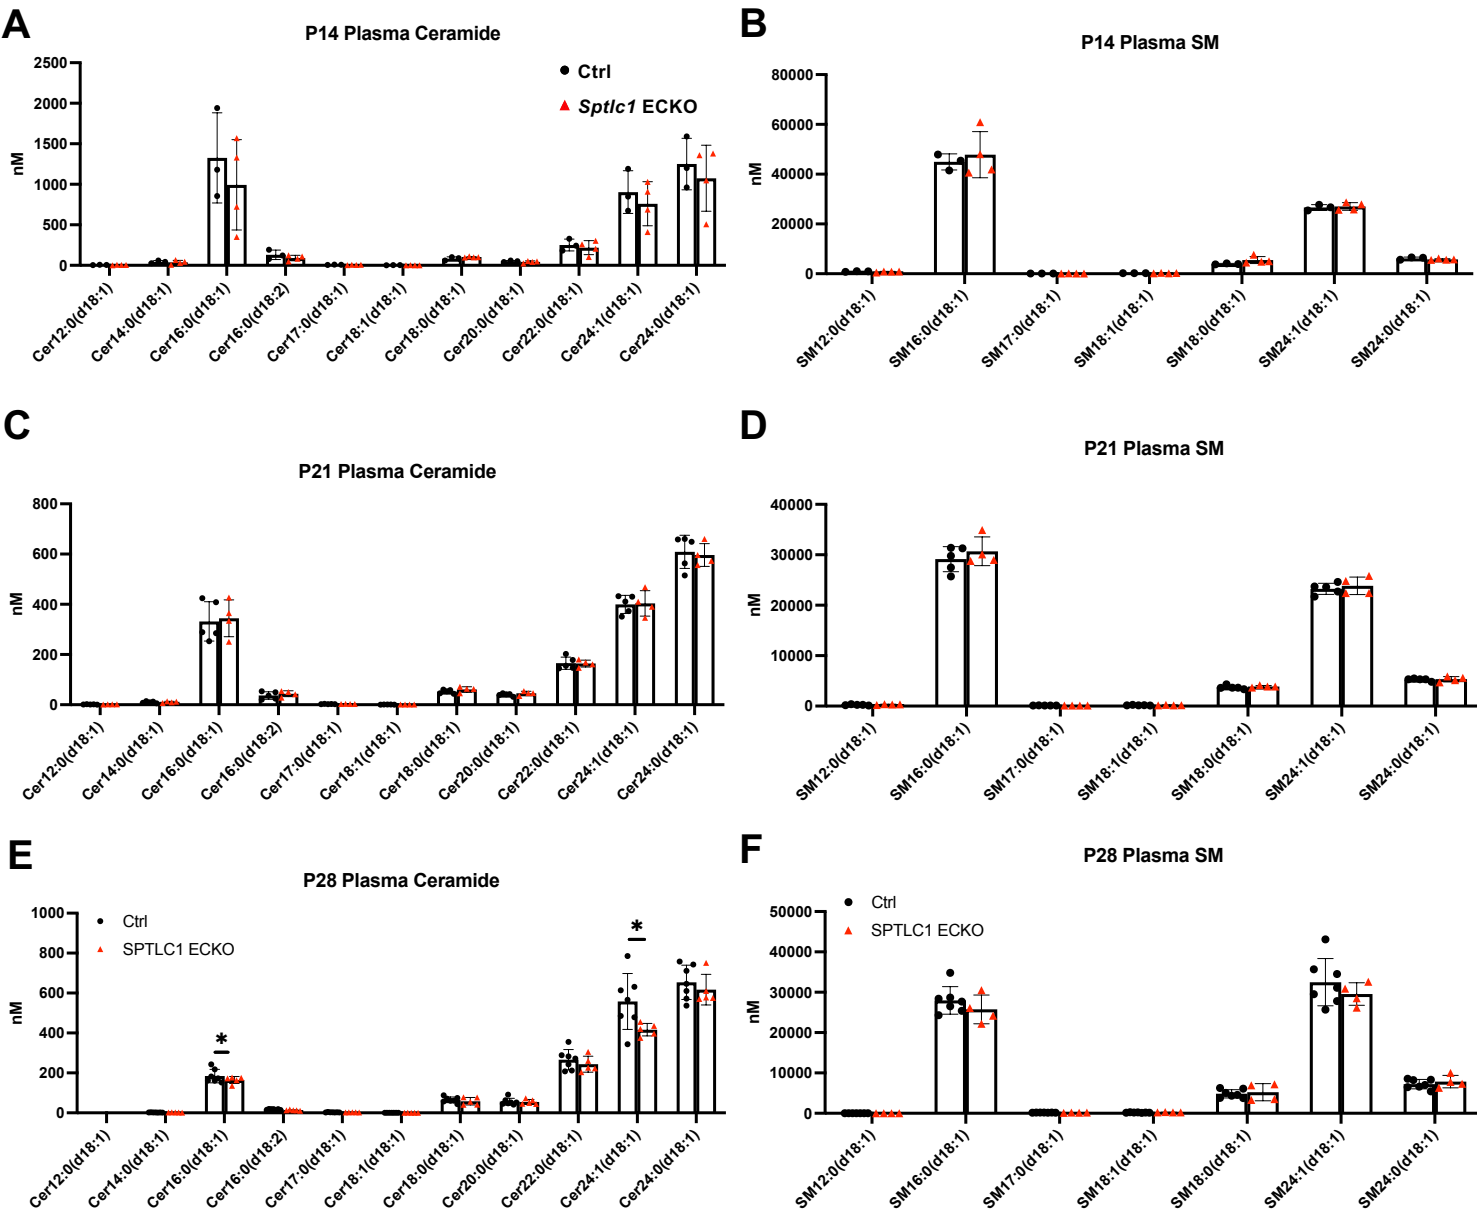

Supplement: supp [file elife-78861-supp-v1.zip]

Figure 3-Figure Supplement 1

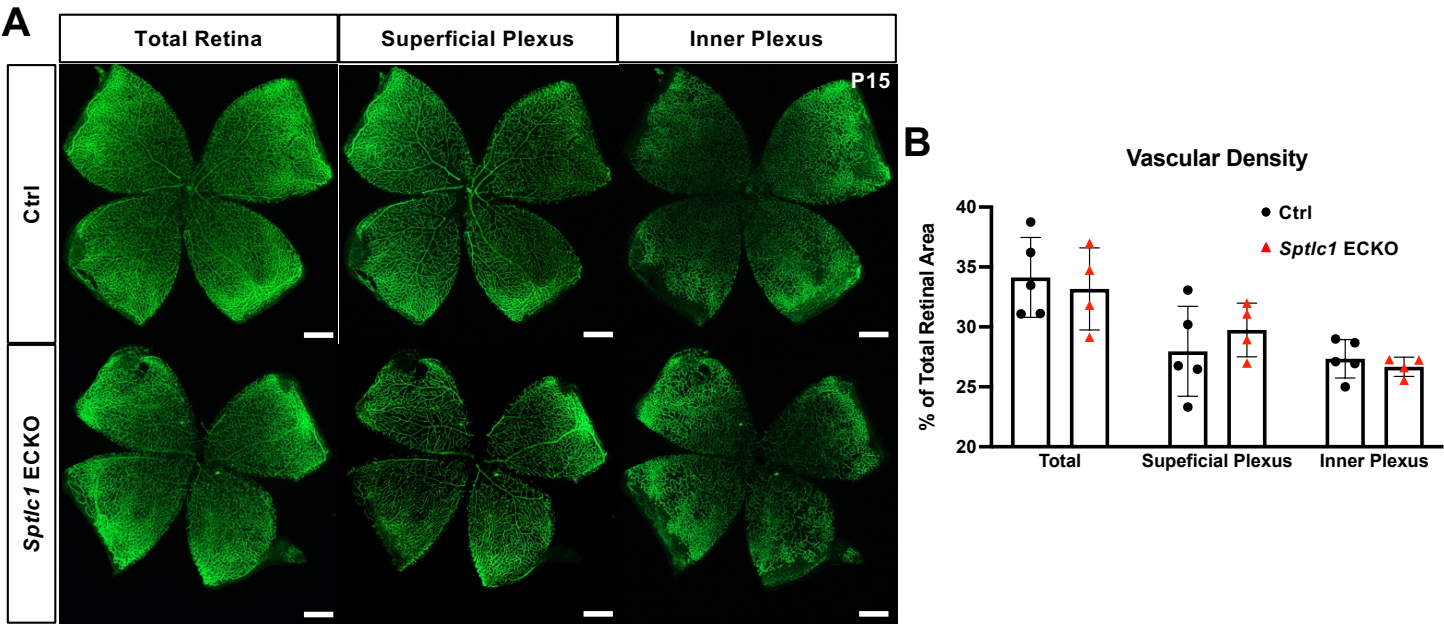

Supplement: supp [file elife-78861-supp-v1.zip]

Figure 1-Figure Supplement 4

A

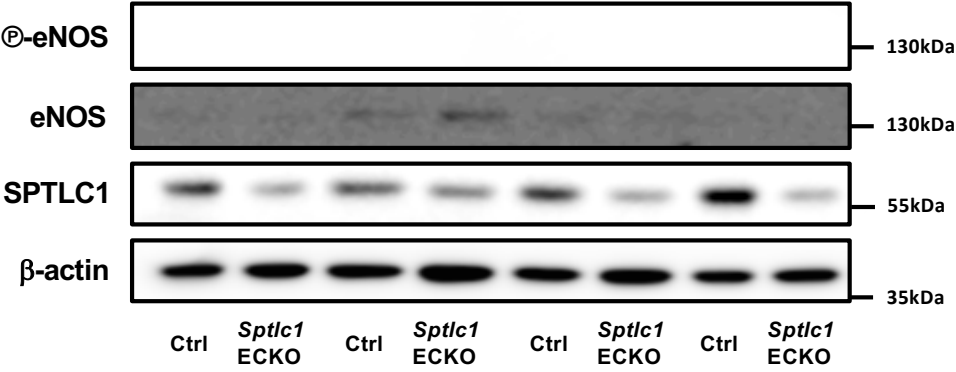

B

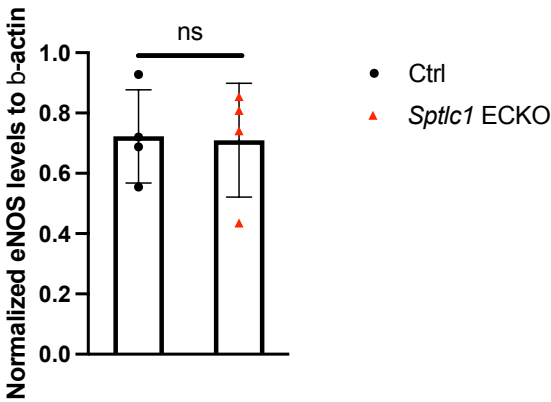

Supplement: supp [file elife-78861-supp-v1.zip]
